# Supplementary material for: Sustained protein therapeutics enabled by self-healing nanocomposite hydrogels for non-invasive bone regeneration
Source: Royal Society of Chemistry journal article supplement (doi:10.1039/c9bm01455a), 2019-11-04
Supplement: c9bm01455a1.pdf [file c9bm01455a1.pdf]

## **Supporting Information**

### **Sustained Protein Therapeutics Enabled by Self-healing Nanocomposite Hydrogels for Non-invasive Bone Regeneration**

Yuanhao Zhang<sup>†a</sup>, Mingjiao Chen<sup>†b</sup>, Zhaobo Dai<sup>a</sup>, Hongliang Cao<sup>a</sup>, Jin Li<sup>\*b</sup> and  
Weian Zhang<sup>\*a</sup>

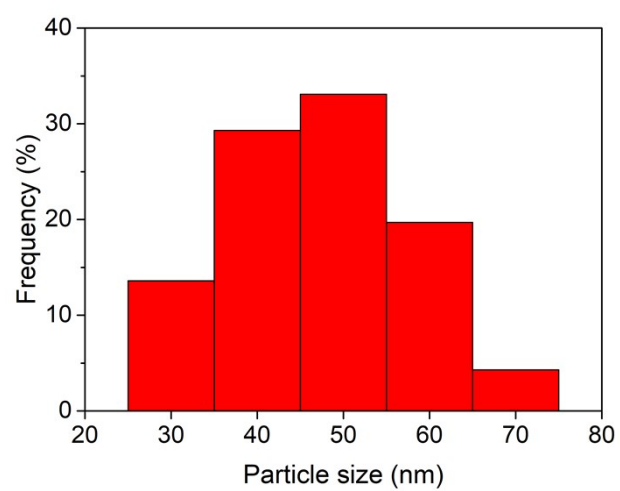

**Fig.S1** The size distribution histogram of LAP nanoplatelets from TEM image.

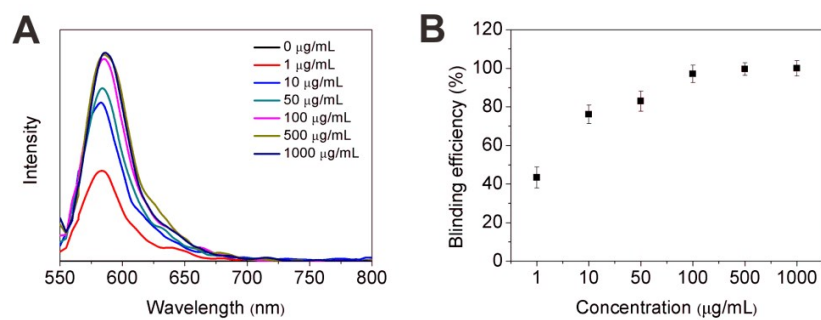

**Fig. S2** A) The fluorescence spectra of LAP@BSA complexes. B) The binding efficiency of BSA by LAP nanoplatelets.

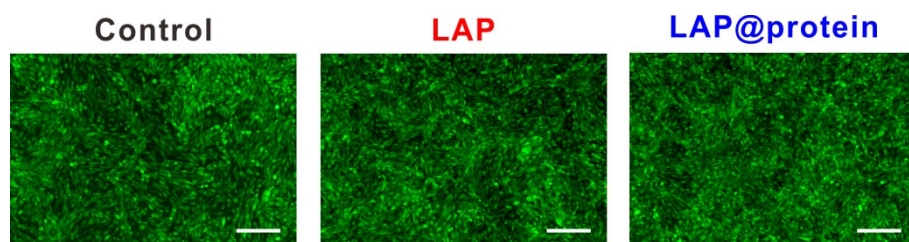

**Fig. S3** The cell viability as incubated with LAP nanoplatelets and LAP@BSA complexes at concentration of 100  $\mu\text{g/mL}$ . The scale bar is 500  $\mu\text{m}$ .

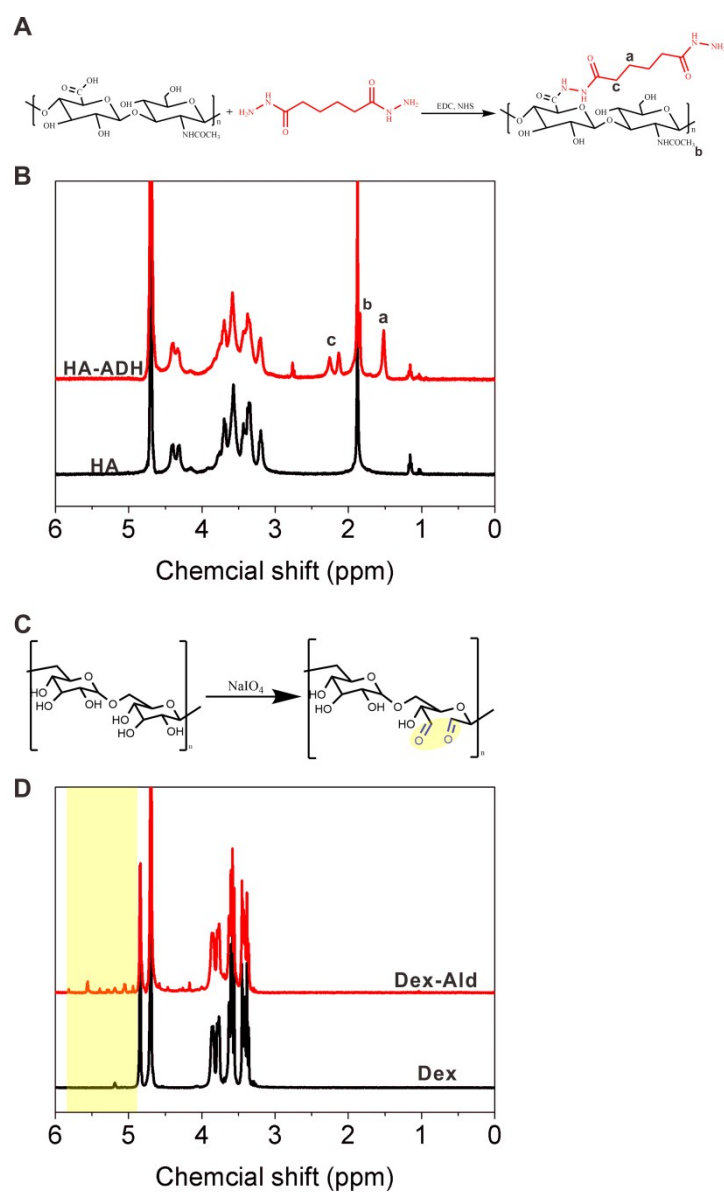

**Fig. S4** A) The synthesis routine of HA-ADH. B) The  $^1\text{H}$ -NMR spectra of HA and HA-ADH. The characteristic methyl peak of acetoamide group (b) appears at 1.9 ppm, while new peaks of methylene protons (a and c) appear at 1.5, 2.1 and 2.2 ppm. C) The preparation of oxidized Dex by  $\text{NaIO}_4$ . D) The  $^1\text{H}$ -NMR spectra of Dex and Dex-Ald. The aldehyde group locates at 4.9-5.8 ppm (marked as yellow).

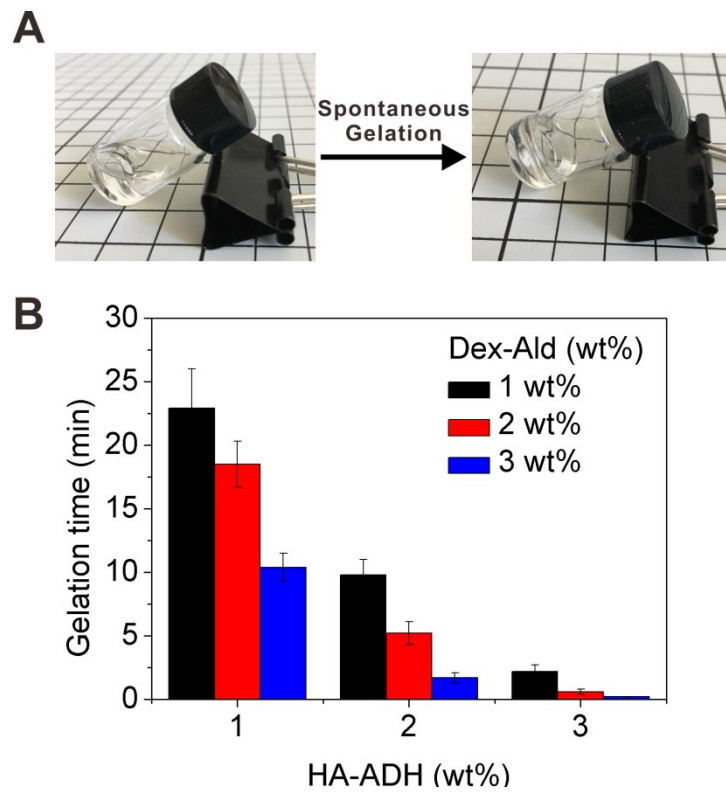

**Fig. S5** A) The images of gelation process of hydrogels. B) The gelation time of hydrogels with orthogonal concentration of HA-ADH and Dex-Ald.

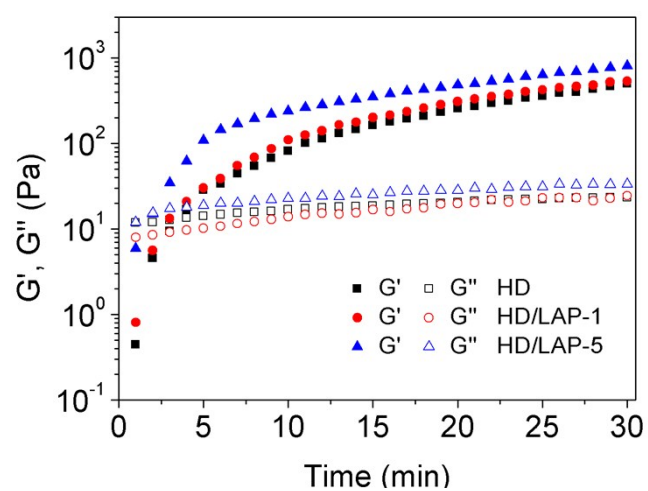

**Fig. S6** The rheological tests of time sweep to evaluate the gelation process of hydrogels with various concentrations of LAP nanoplatelets.

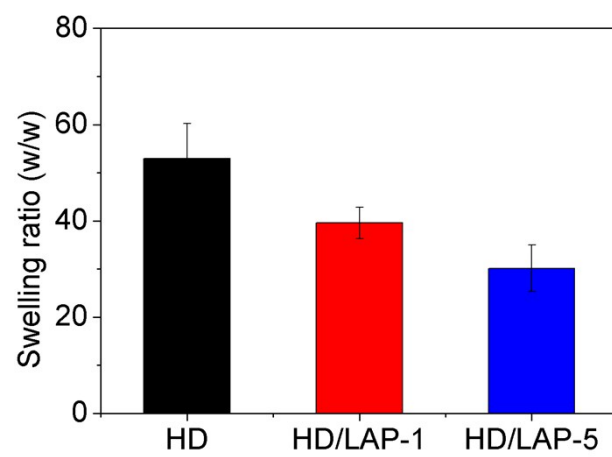

**Fig. S7** The swelling behavior of HD/LAP hydrogels.

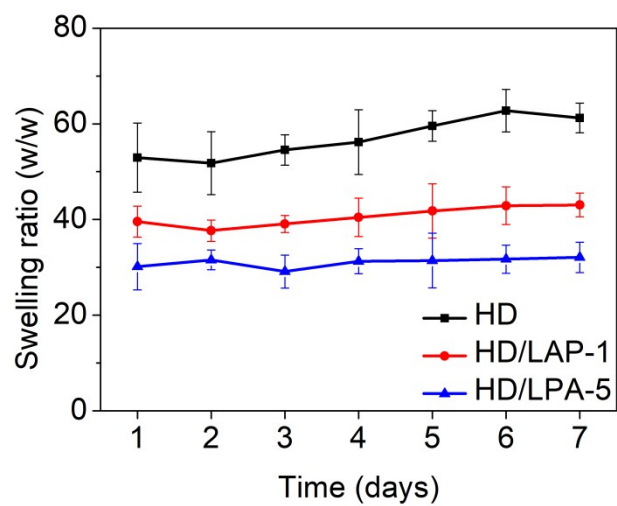

**Fig. S8** The stability of hydrogels immersed in PBS for one week.

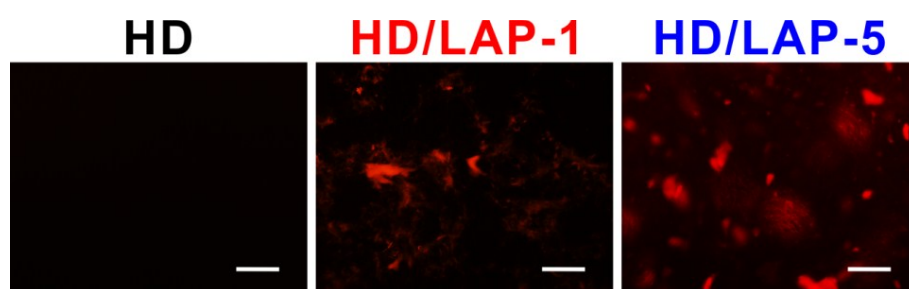

**Fig. S9** The fluorescence image of HD/LAP hydrogel immersed in medium containing rhodamine-conjugated BMP-2. The scale bar is 100  $\mu\text{m}$ .

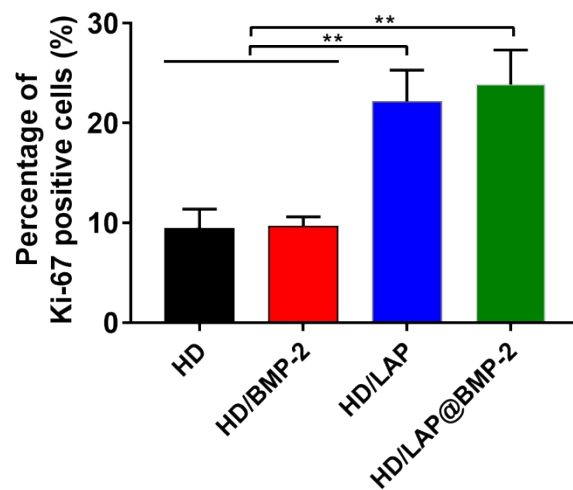

**Fig. S10** The percentage of Ki-67 positive cells. \* $p < 0.05$  and \*\* $p < 0.01$ .

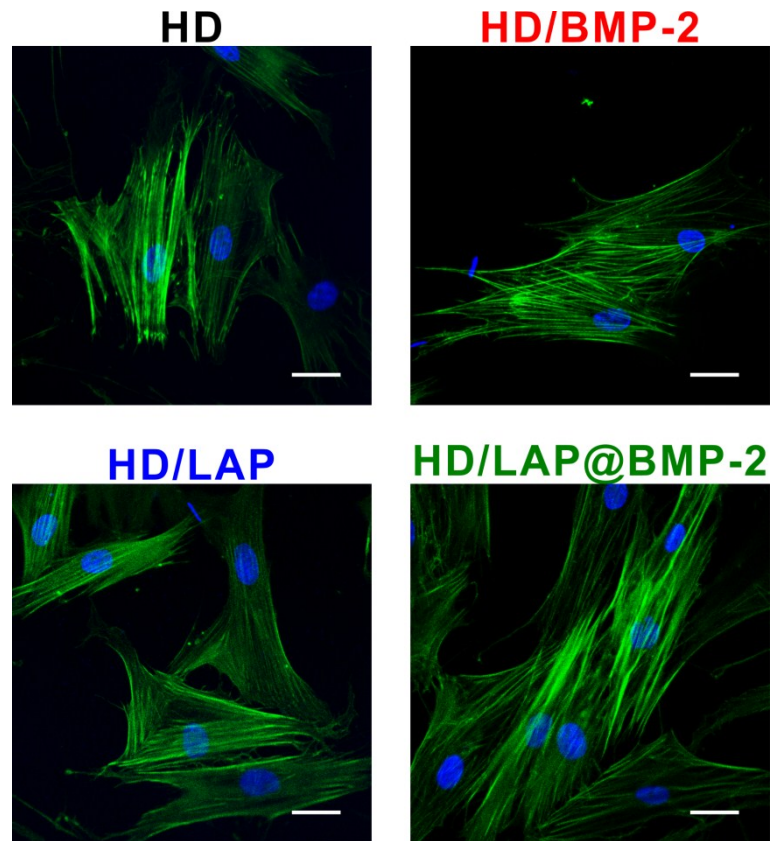

**Fig. S11** The morphology of rBMSCs incubated on 2D hydrogel surfaces. The scale bar is 25  $\mu\text{m}$ .

**Table S1** Primers and parameters used for the real-time PCR analysis

| Gene   | Accession | Primer sequence                                                                | Annealing       | Product           |
|--------|-----------|--------------------------------------------------------------------------------|-----------------|-------------------|
| Name   | No.       |                                                                                | temperature(°C) | size (base pairs) |
| ALP    | NM_000478 | Forward: 5'-GTGAACCGCAACTGGTACTC-3'<br>Reverse: 5'-GAGCTGCGTAGCGATGTCC-3'      | 60              | 454               |
| RUNX-2 | NM_001015 | Forward:5'-TGGTTACTGTCATGGCGGGTA-3'<br>Reverse:5'- TCTCAGATCGTTGAACCTTGCTA -3' | 60              | 101               |
| OSX    | NM_152860 | Forward:5'-CCTCTGCGGGACTCAACAAC-3'<br>Reverse:5'-AGCCCATTAGTGCTTGTAAGG-3'      | 60              | 128               |
| OPN    | NM_001251 | Forward:5'-CTCCATTGACTCGAACGACTC-3'<br>Reverse:5'-CAGGTCTGCGAACTTCTTAGAT-3'    | 60              | 230               |
| GAPDH  | NM_001256 | Forward:5'-GGAGCGAGATCCCTCCAAAAT-3'<br>Reverse:5'-GGCTGTTGTCATACTTCTCATGG-3'   | 60              | 197               |
